# Supplementary material for: Scalable synthesis of a sulfur nanosponge cathode for a lithium–sulfur battery with improved cyclability
Source: Royal Society of Chemistry journal article supplement (doi:10.1039/c4ta04759a), 2014-01-01
Supplement: c4ta04759a1.pdf [file c4ta04759a1.pdf]

| Approach                                             | discharge Capacity (mAh/g) | Reversible discharge capacity (mAh/g)                                                            | Charge rate (mA/g)      | Total cycle number                  | Degradation rate per cycle                | Sulfur Loading                        | Ref.         |
|------------------------------------------------------|----------------------------|--------------------------------------------------------------------------------------------------|-------------------------|-------------------------------------|-------------------------------------------|---------------------------------------|--------------|
| SULFUN                                               | 1000-1400                  | 520 (300 <sup>th</sup> , 0.2C)<br>290 (500 <sup>th</sup> , 0.2C)<br>400 (250 <sup>th</sup> , 2C) | 335 (0.2C)<br>3350 (2C) | >500                                | 0.24% (0.2C)<br>0.36% (2C)                | 65 wt% (2mg/cm <sup>2</sup> )         | Current work |
| S-TiO <sub>2</sub> yolk-shell nanocomposite          | 1,030                      | 690                                                                                              | 836 (C/2)               | 1,000                               | 0.033%                                    | 53 wt %<br>0.4–0.6 mg/cm <sup>2</sup> | 12           |
| Solvent-in-salt electrolyte                          | 1,041                      | 770                                                                                              | 335 (C/5)               | 100                                 | 0.26%                                     | 48 wt %                               | 15           |
| Ordered mesoporous C-S                               | 1,070                      | 700                                                                                              | 1675 (1C)               | 100                                 | 0.35%                                     | 57 wt %                               | 27           |
| Double-shelled C-S composite                         | 1,020                      | 690                                                                                              | 167 (C/10)              | 100                                 | 0.32%                                     | 45 wt %                               | 28           |
| Porous hollow C-S composite                          | 1,071                      | 974                                                                                              | 836 (C/2)               | 100                                 | 0.09%                                     | 65 wt %                               | 19           |
| Hollow CNF-encapsulated S                            | ~1,400                     | 730                                                                                              | 836(C/2)                | 150                                 | 0.48%                                     | ~1.0 mg / cm <sup>2</sup>             | 25           |
| Amphiphilic surface-modified hollow CNF-S            | 828                        | ~660                                                                                             | 836 (C/2)               | 300                                 | 0.07%                                     | ~1.0 mg / cm <sup>2</sup>             | 29           |
| Ultrasound-assisted S-C with fluorinated ether       | 1,195                      | 836                                                                                              | 230                     | 100                                 | 0.30%                                     | 29 wt %                               | 30           |
| S molecules in a C/CNT matrix                        | 1,670                      | 1,142                                                                                            | 167.5 (C/10)            | 200                                 | 0.16%                                     | 32 wt %                               | 31           |
| Li-S with interlayers with modified recharge setting | 1,483                      | 600 and 1000                                                                                     | 335 (C/5)               | >300 (600mAh/g)<br>>200 (1000mAh/g) | 0.0011% (600mAh/g)<br>0.0027% (1000mAh/g) | 70 wt%                                | 14           |

Table S1

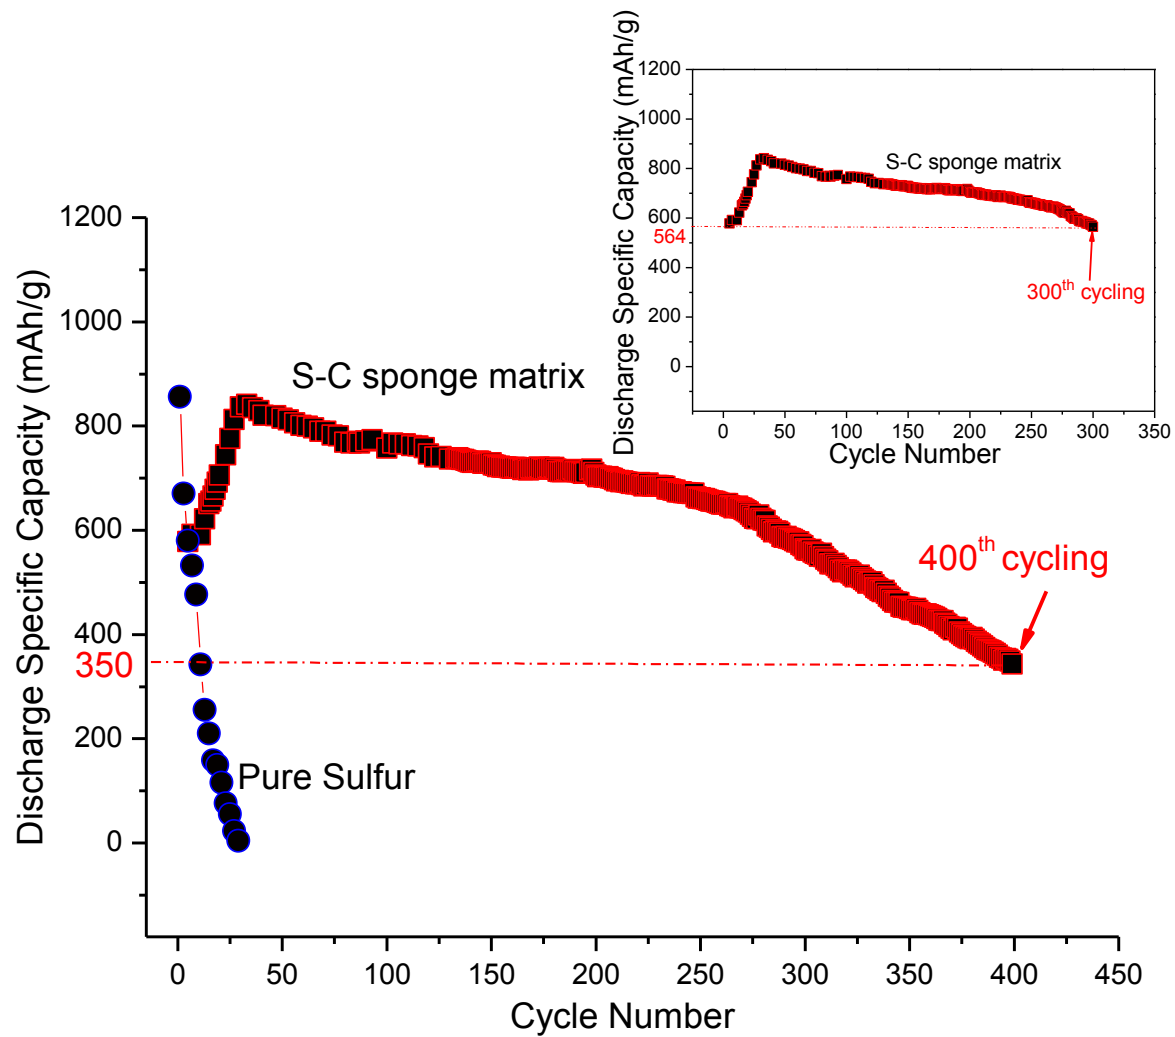

Fig. S1

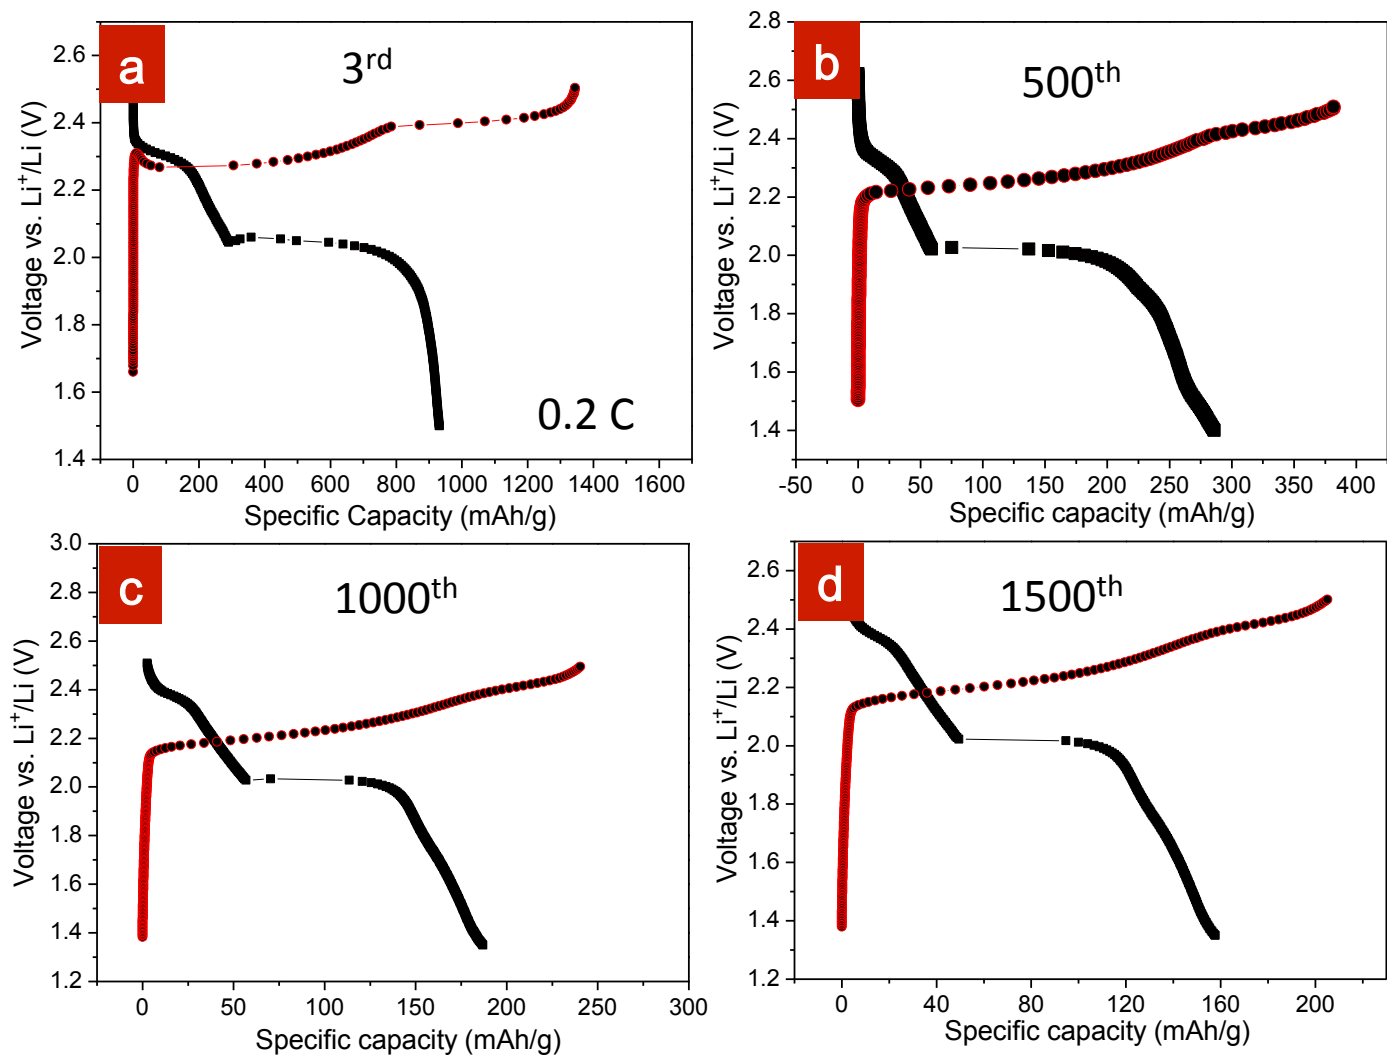

Fig. S2

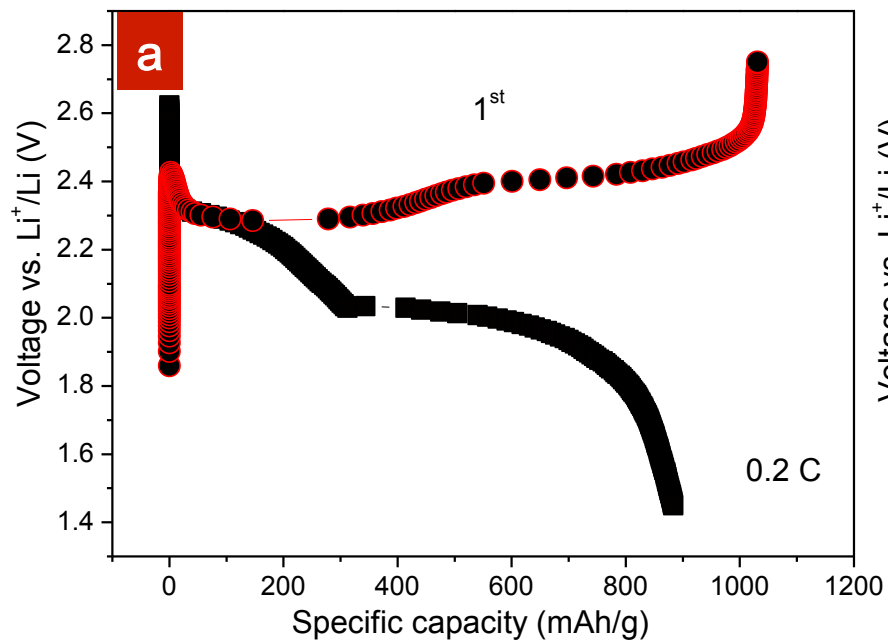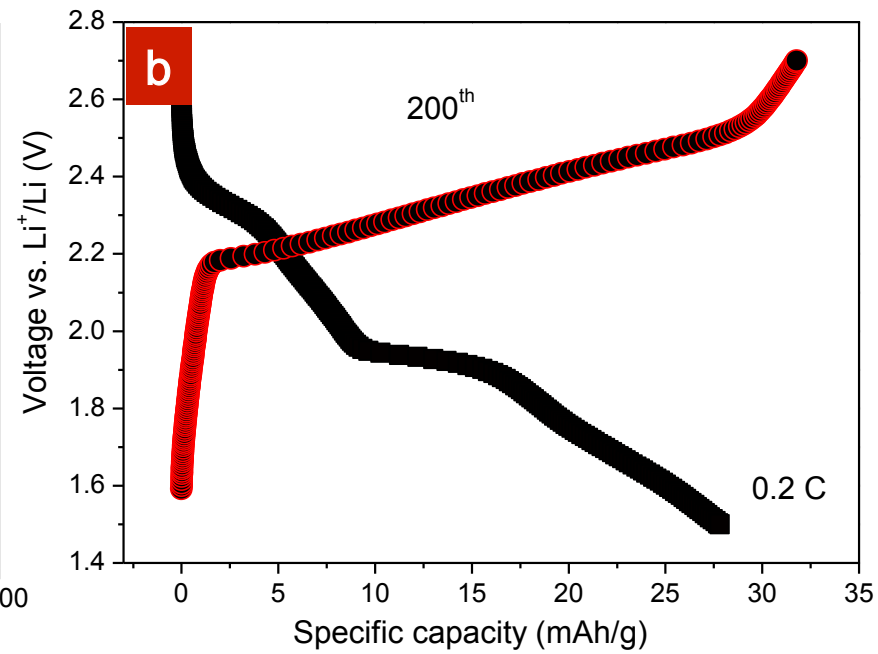

Fig. S3

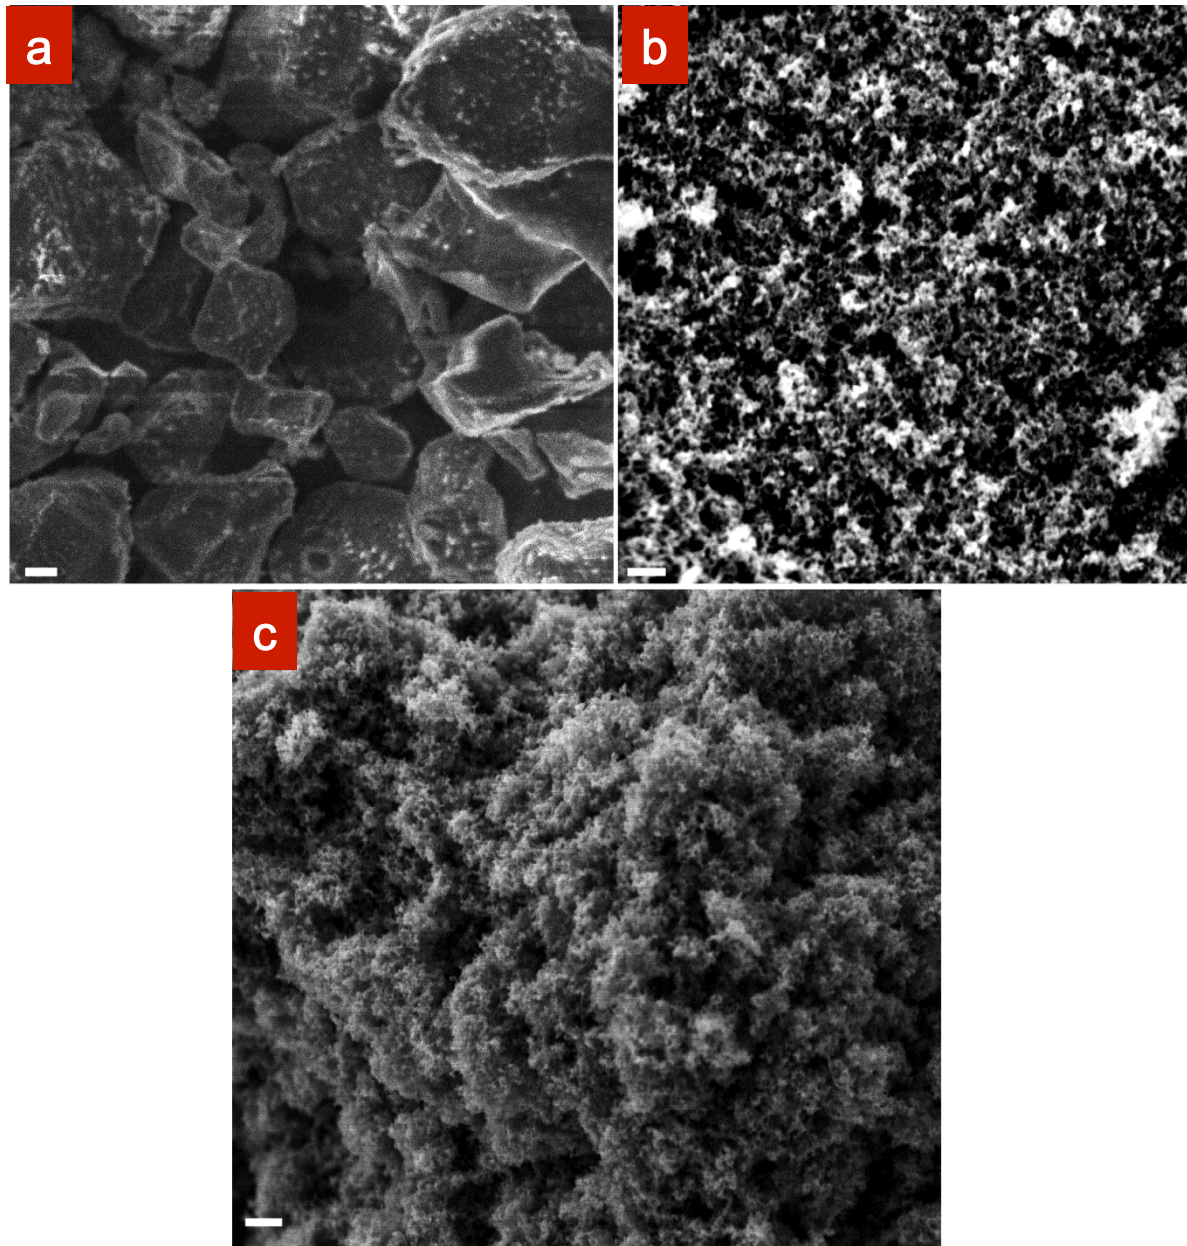

Fig. S4

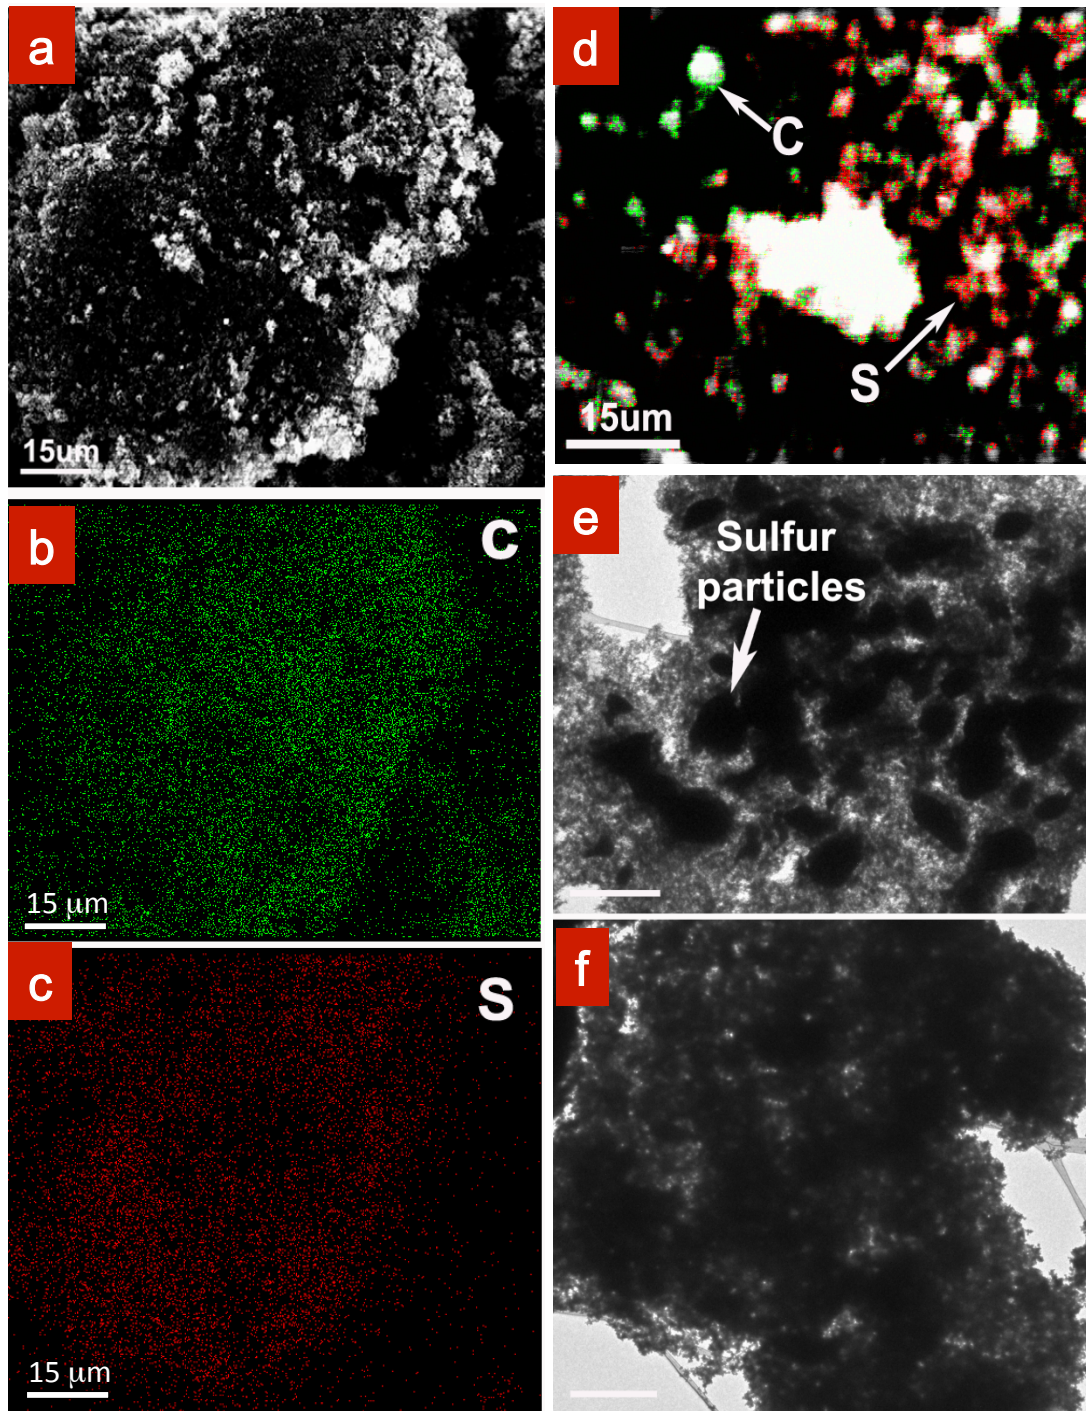

Fig. S5



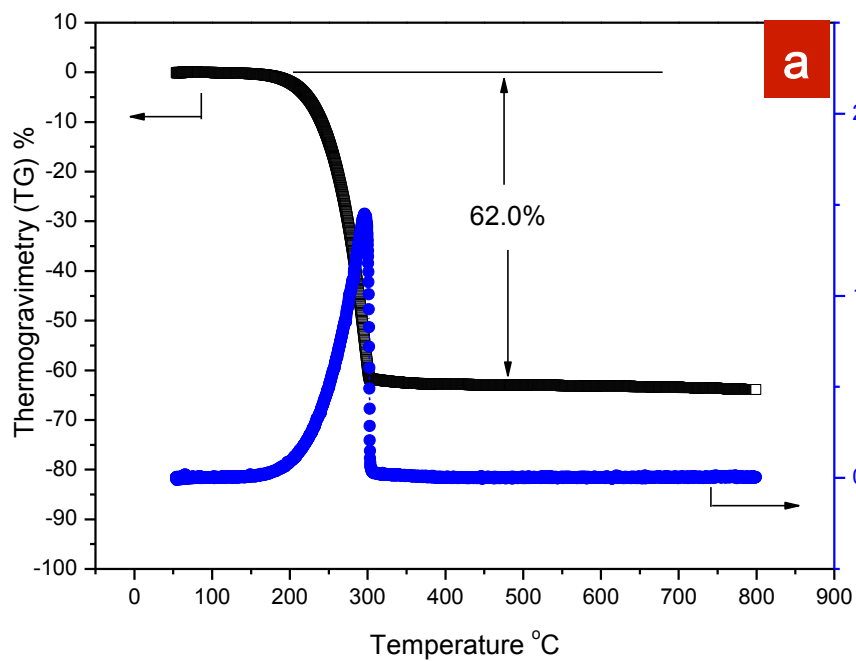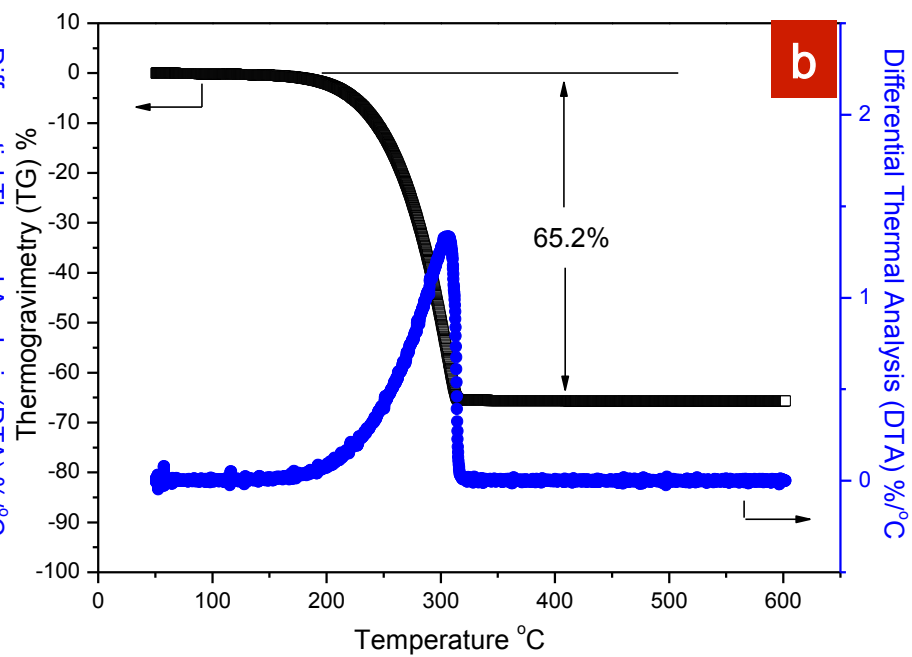

Fig. S6

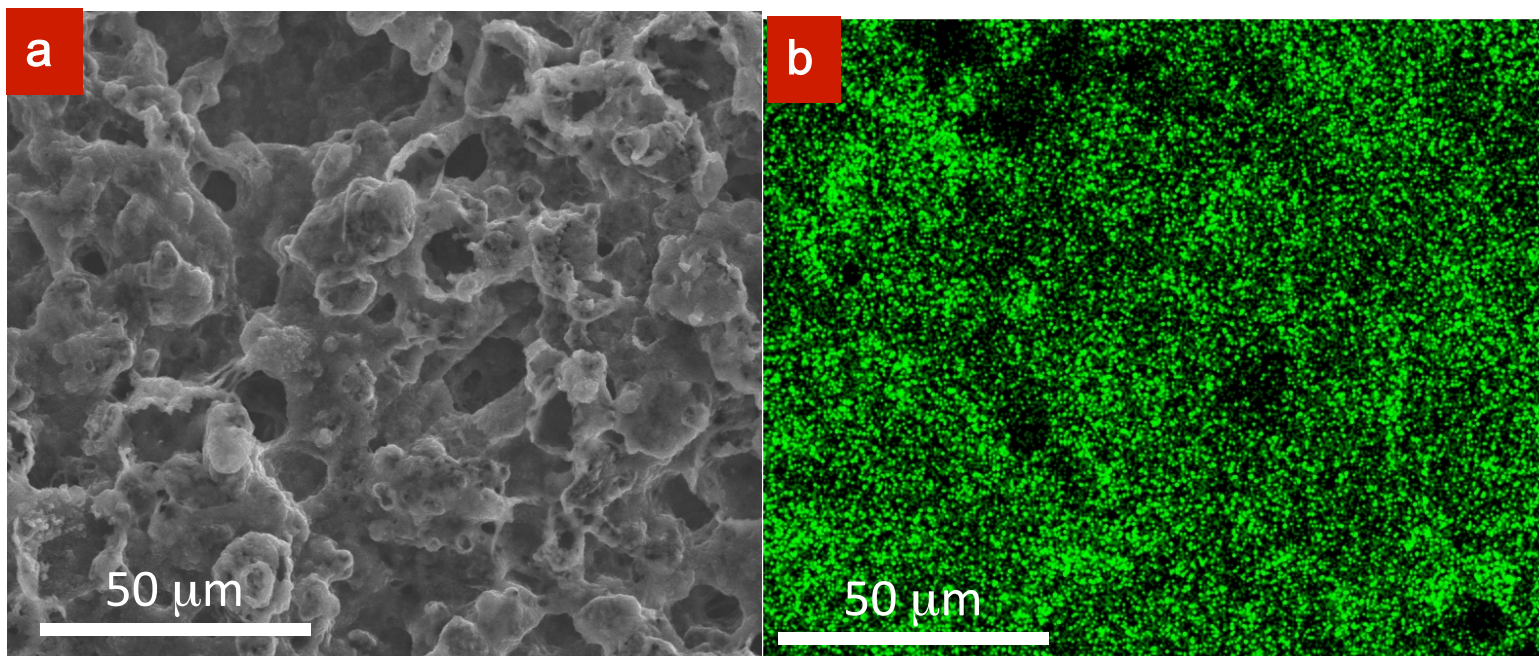

Fig. S7



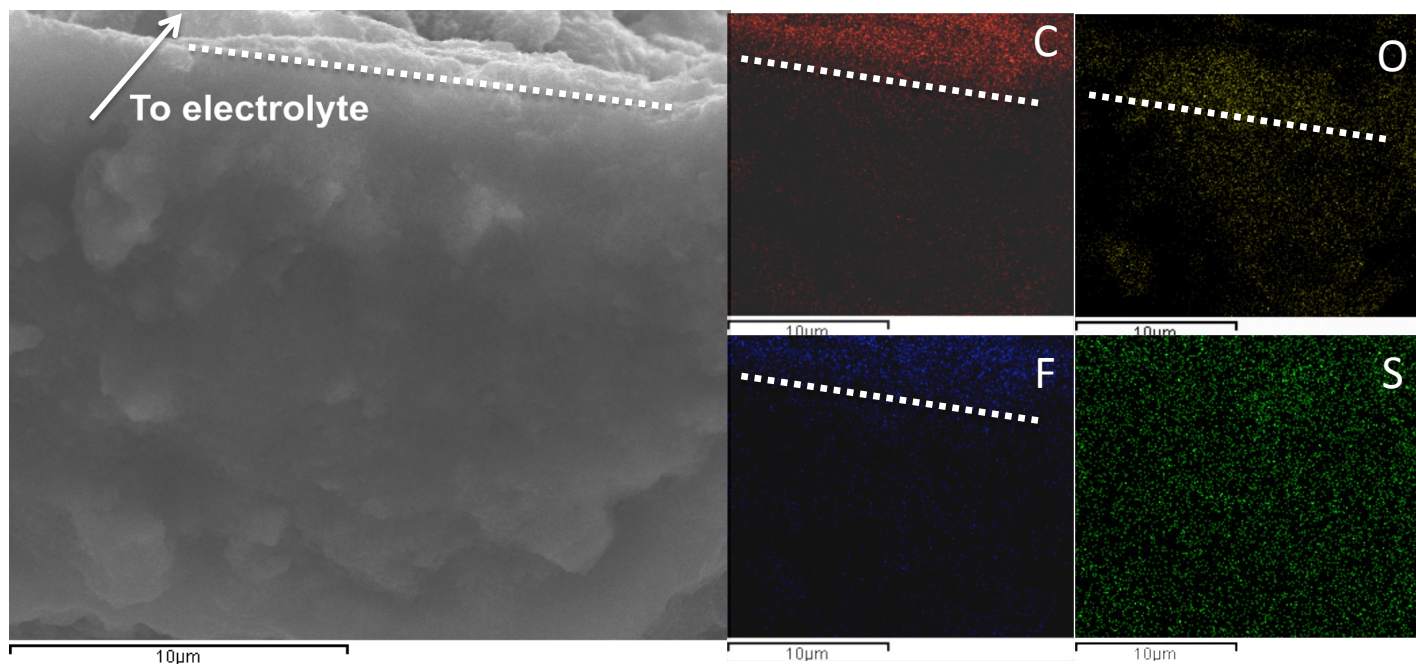

Fig. S8

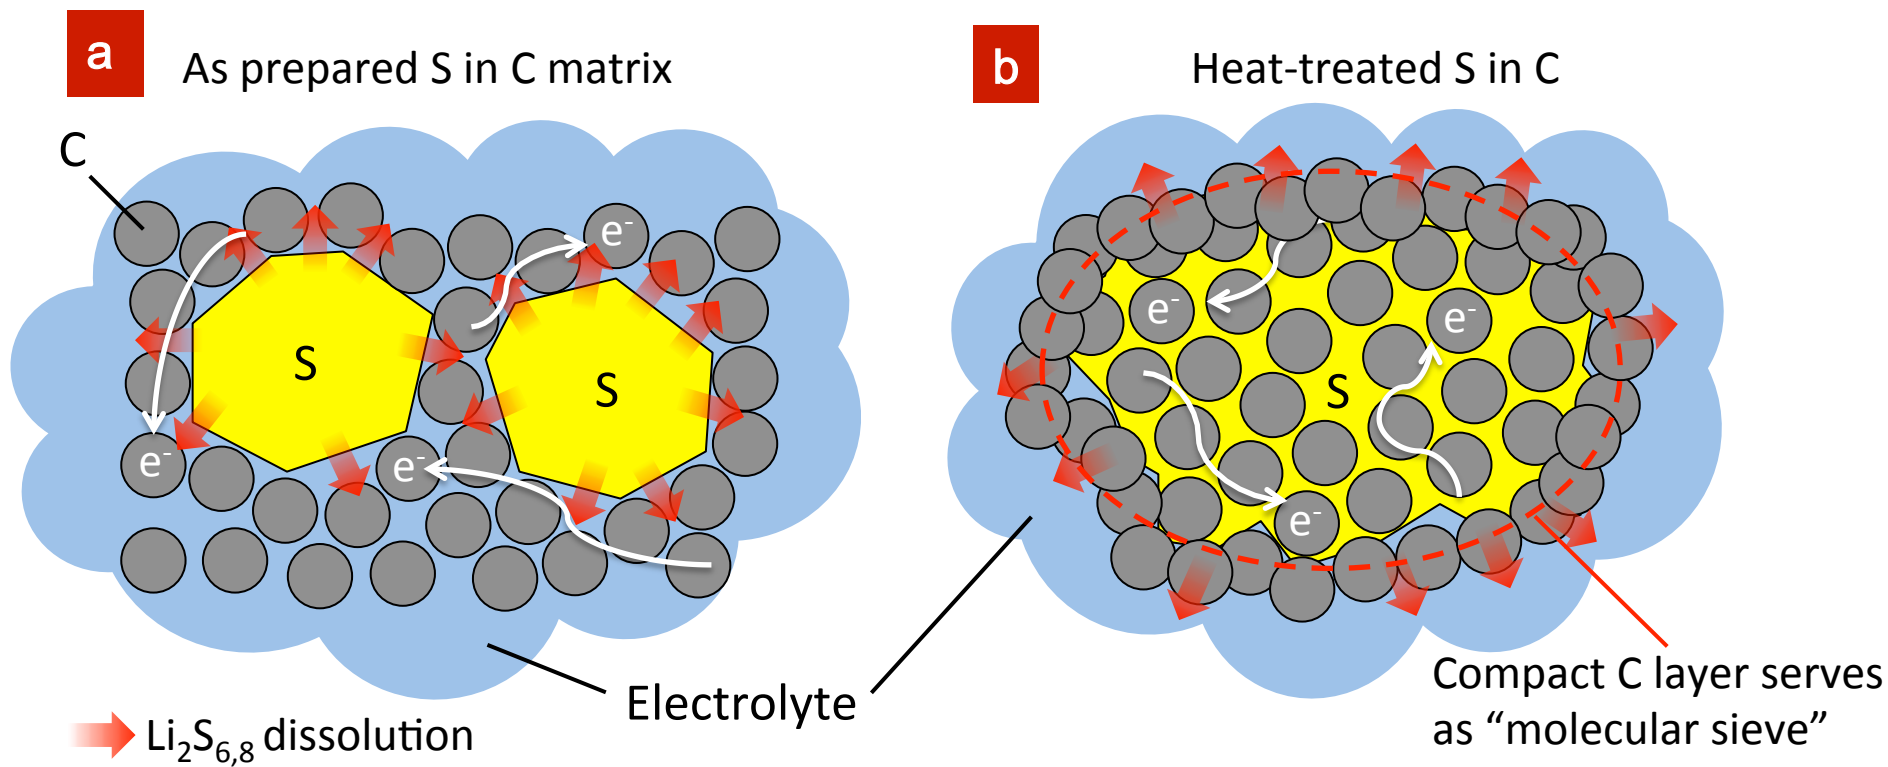

Fig. S9
